# Supplementary material
Source: publisher figshare collection journal article supplement (https://aacr.figshare.com/ndownloader/files/39819512)
Supplement: Supplementary file 1 [file 39819512]

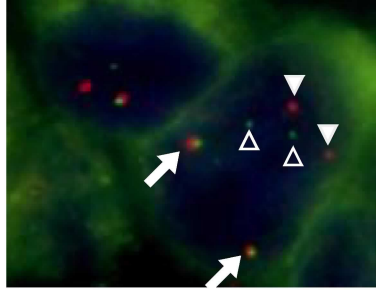

**Figure S2.** Rearrangement of the *ALK* locus. FISH analysis of tumor cells (ID #7969) with fluorescently labeled probes specific for the 5' (green signals) or 3' (red signals) regions of the *ALK* locus revealed the presence of the intact locus (arrows) as well as split signals (open and closed arrowheads).
